# Supplementary material for: Characterization of Novel Rhabdoviruses in Chinese Bats
Source: Viruses. 2021 Jan 5;13(1):64. doi: 10.3390/v13010064 (PMC7824899; doi:10.3390/v13010064)
Supplement: Supplementary file 1 [file viruses-13-00064-s001.zip]

Archive with 12 entries (12 files):
- Figure S1.pdf
- Figure S2.pdf
- Figure S3.pdf
- Table S1.xlsx
- Table S2.xlsx
- Table S3.xlsx
- Table S4.xlsx
- Table S5.xlsx
- Table S6.xlsx
- Table S7.pdf
- Table S8.pdf
- Table S9.xlsx
