# Supplementary material for: Characterization of Novel Rhabdoviruses in Chinese Bats
Source: Viruses. 2021 Jan 5;13(1):64. doi: 10.3390/v13010064 (PMC7824899; doi:10.3390/v13010064)
Supplement: Supplementary file 1 [file viruses-13-00064-s001.zip › Figure S1.pdf]

**Figure S1.** Sequences of the transcription initiation (TI) and the transcription termination (TTP) signals of the 6 Chinese bat rhabdoviruses gene junctions. Conserved motifs are indicated in grey for TI or underlined for TTP. The consensus sequences are indicated, with Y = C/T, M = A/C, W = C/G and R = A/G.

|                      |                  |                     |                 |         |
|----------------------|------------------|---------------------|-----------------|---------|
| <b>Ledantevirus</b>  |                  |                     |                 |         |
| <b>TYBV</b>          | <b>N-P</b>       | <u>CATGAAAAAAAA</u> | C               | AACGAGG |
|                      | <b>P-M</b>       | <u>CGTGAAAAAAAA</u> | TGTTGCAGATTTTCA | AACGTGG |
|                      | <b>M-G</b>       | <u>CATGAAAAAAAA</u> | C               | AACGAGC |
|                      | <b>G-L</b>       | <u>CATGAAAAAAAA</u> | TC              | AACGAGG |
| <b>Vesiculovirus</b> |                  |                     |                 |         |
| <b>QZBV</b>          | <b>N-P</b>       | <u>CATGAAAAAAAA</u> | CTAACAGA        |         |
|                      | <b>P-M</b>       | <u>TATGAAAAAAAA</u> | CTAACAGG        |         |
|                      | <b>M-G</b>       | <u>TATGAAAAAAAA</u> | CTAACAGG        |         |
|                      | <b>G-L</b>       | <u>TATGAAAAAAAA</u> | CTAACAGA        |         |
|                      | <b>L-trailer</b> | <u>TATGAAAAAAAA</u> |                 |         |
| <b>YSBV</b>          | <b>Leader-N</b>  |                     | TAACAGA         |         |
|                      | <b>N-P</b>       | <u>TATGAAAAAAAA</u> | CTAACAGA        |         |
|                      | <b>P-M</b>       | <u>CATGAAAAAAAA</u> | CTAACAGG        |         |
|                      | <b>M-G</b>       | <u>TCTGAAAAAAAA</u> | CTAGCAGA        |         |
|                      | <b>G-L</b>       | <u>TATGAAAAAAAA</u> | CTAACAGA        |         |
|                      | <b>L-trailer</b> | <u>CATGAAAAAAAA</u> |                 |         |
