# Supplementary material for: Characterization of Novel Rhabdoviruses in Chinese Bats
Source: Viruses. 2021 Jan 5;13(1):64. doi: 10.3390/v13010064 (PMC7824899; doi:10.3390/v13010064)

**Legend:**

*Lyssavirus*  
genus

*Vesiculovirus*  
genus

*Lyssavirus*  
genus

*Vesiculovirus*  
genus

*Lyssavirus*  
genus

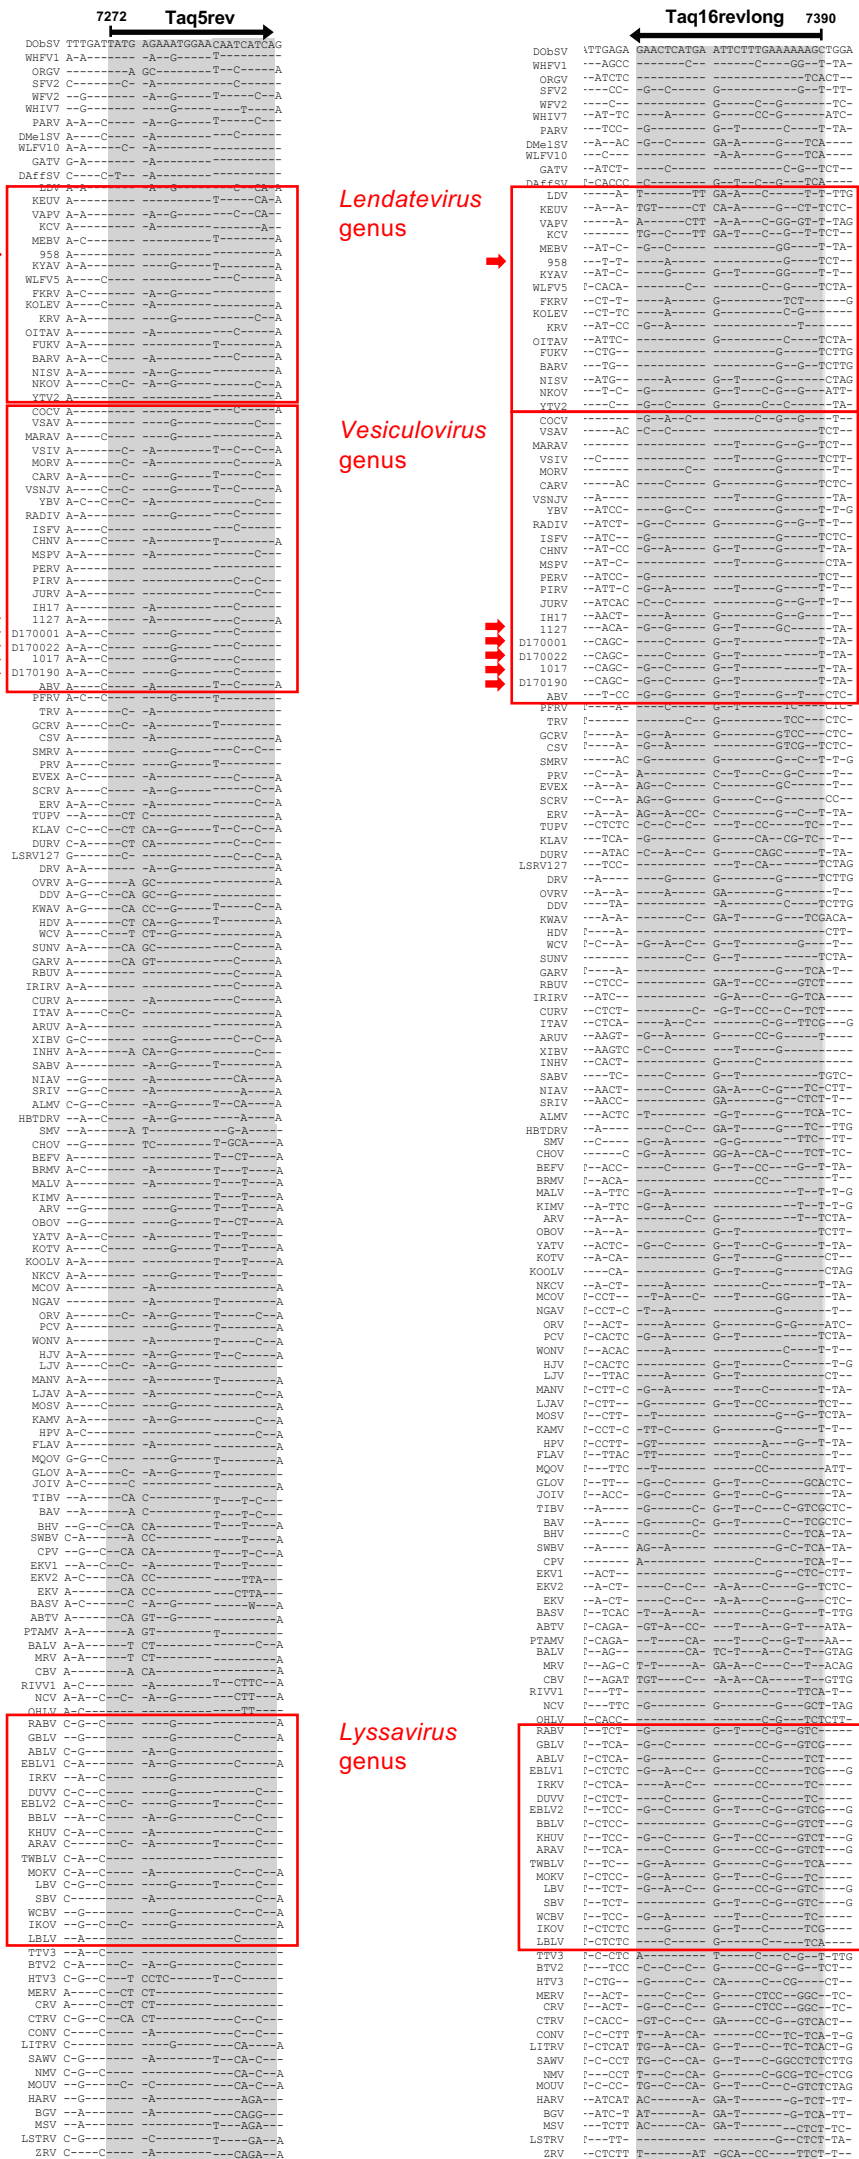

Supplement: Supplementary file 1 [file viruses-13-00064-s001.zip › Figure S2.pdf]
