# Supplementary material for: Characterization of Novel Rhabdoviruses in Chinese Bats
Source: Viruses. 2021 Jan 5;13(1):64. doi: 10.3390/v13010064 (PMC7824899; doi:10.3390/v13010064)
Supplement: Supplementary file 1 [file viruses-13-00064-s001.zip › Table S1.xlsx]

## Sheet: Table S1
Table S1. Detection of rhabdoviruses in bat brain samples.
	No.positive/no.tested (%)
Species	Yunnan	Guangdong	Guangxi	Hainan	Hunan	Hubei	Sichuan	Henan	Chongqin	Tianjin	Tibet	Total (%)
Frugivorous
Eonycteris spelaea	0/64											0/64 (0)
Rousettus amplexicaudatus											0/2	0/2 (0)
Rousettus leschenaultii			0/5									0/5 (0)
Rousettus sp.	0/83											0/83 (0)
Cynopterus sphinx	0/2										0/1	0/3 (0)
Insectivorous
Rhinolophus sinicus	0/7	0/1			0/9	5/157 (3.18)	0/1				0/1	5/176 (2.84)
Rhinolophus pearsonii	0/10	0/1							0/2		0/2	0/15 (0)
Rhinolophus macrotis						0/1			0/1			0/2 (0)
Rhinolophus affinis	0/52	0/2		1/9 (11.11)		0/6		0/3				1/72 (1.39)
Rhinolophus pusillus	0/15	0/2				0/10						0/27 (0)
Rhinolophus blythi						0/3						0/3 (0)
Rhinolophus monoceros	0/6					0/1						0/7 (0)
Rhinolophus luctus	0/7											0/7 (0)
Rhinolophus clivosus	0/4											0/4 (0)
Rhinolophus ferrumequinum	0/1											0/1 (0)
Rhinolophus thomasi	0/2											0/2 (0)
Rhinolophus sp.	0/1											0/1 (0)
Hipposideros armiger	0/38	0/7			0/1	0/41		0/1	0/1		0/1	0/90 (0)
Hipposideros larvatus	0/54	0/1										0/55 (0)
Hipposideros pomona	0/64	0/1		0/1								0/66 (0)
Hipposideros pratti						0/9						0/9 (0)
Aselliscus stoliczkanus	0/37											0/37 (0)
Myotis chinensis	0/35	0/1										0/36 (0)
Myotis ricketti	0/26	2				0/10				0/29		0/67 (0)
Myotis fimbriatus	0/11											0/11 (0)
Myotis laniger	0/10											0/10 (0)
Myotis petax										0/5		0/5 (0)
Myotis davidii						0/8						0/8 (0)
Myotis blythi						0/2						0/2 (0)
Myotis frater		0/2										0/2 (0)
Myotis daubentonii		0/2										0/2 (0)
Myotis sp.	0/5					0/19						0/24 (0)
Miniopterus schreibersii	0/41	0/1				0/6		0/3				0/51 (0)
Miniopterus fuliginosus		0/16										0/16 (0)
Miniopterus pusillus		0/2										0/2 (0)
Tylonycteris pachypus			0/18									0/18 (0)
Tylonycteris robustula			0/2									0/2 (0)
Pipistrellus pipistrellus	0/5					0/1					0/1	0/7 (0)
Pipistrellus abramus		0/1				0/1						0/2 (0)
Pipistrellus pulveratus		0/1										0/1(0)
Scotophilus heathi	0/36											0/36 (0)
Scotophilus kuhli		0/1										0/1 (0)
Vespertilio sinensis							0/4					0/4 (0)
Chaerephon plicata		0/1										0/1 (0)
Ia io	0/3					0/1						0/4 (0)
Eptesicus.sp						0/1						0/1 (0)
Total (%)	0/619 (0)	0/45 (0)	0/25 (0)	1/10 (10)	0/10 (0)	5/277 (1.81)	0/5 (0)	0/7 (0)	0/4 (0)	0/34 (0)	0/8 (0)	6/1044 (0.57)
