# Supplementary material for: Characterization of Novel Rhabdoviruses in Chinese Bats
Source: Viruses. 2021 Jan 5;13(1):64. doi: 10.3390/v13010064 (PMC7824899; doi:10.3390/v13010064)
Supplement: Supplementary file 1 [file viruses-13-00064-s001.zip › Table S2.xlsx]

## Sheet: Table S2
Table S2. Detection of rhabdoviruses in bat saliva samples.
	No.positive/no.tested (%)
Species	Yunnan	Guangdong	Guangxi	Sichuan	Hubei	Zhejiang	Jiangsu	Jiangxi	Anhui	Hebei	Henan	Shandong	Shaanxi	Gansu	Ningxia	Tibet	Beijing	Total (%)
Frugivorous
Eonycteris spelaea	0/100																	0/100 (0)
Rousettus amplexicaudatus																0/5		0/5 (0)
Rousettus leschenaultii	0/47	0/5	0/5															0/57 (0)
Cynopterus sphinx			0/23													0/3		0/26 (0)
Insectivorous
Rhinolophus sinicus	0/98	0/132	0/42		0/78	0/2	0/17									0/2		0/371 (0)
Rhinolophus pearsonii		0/12														0/4		0/16 (0)
Rhinolophus macrotis	0/1		0/1		0/2		0/1			0/8								0/13 (0)
Rhinolophus affinis	0/13	0/54	0/3		0/8		0/12											0/90 (0)
Rhinolophus pusillus	0/18	0/76	0/174	0/12	0/2		0/7			0/4		0/26						0/319 (0)
Rhinolophus ferrumequinum	0/4				0/8	0/3				0/36	0/19	0/23		0/1			0/5	0/99 (0)
Rhinolophus robinsoni			0/4															0/4 (0)
Rhinolophus rex	0/2	0/8	0/4															0/14 (0)
Hipposideros armiger	0/34	0/117	0/40		0/66			0/5	0/40							0/7		0/309 (0)
Hipposideros larvatus		0/44	0/101													0/1		0/146 (0)
Hipposideros pomona		0/55	0/30															0/85(0)
Hipposideros pratti		0/61			0/1	0/40		0/9										0/111 (0)
Aselliscus stoliczkanus	0/37		0/1															0/38 (0)
Myotis ricketti	0/4	0/107			0/70			0/10									0/25	0/216 (0)
Myotis davidii					0/3													0/3 (0)
Myotis chinensis	0/4	0/44																0/48 (0)
Myotis daubentonii	0/1	0/37			0/11													0/49 (0)
Myotis siligorensis			0/103															0/103 (0)
Myotis longipes		0/13	0/3															0/16 (0)
Myotis altarium		0/1					0/1											0/2 (0)
Myotis annectans		0/1																0/1 (0)
Myotis brandti							0/6							0/2	0/2			0/10 (0)
Myotis blythii														0/6	0/1			0/7 (0)
Myotis fimbriatus													0/2					0/2 (0)
Myotis sp.	0/6	0/22		0/33	0/4													0/65 (0)
Pipistrellus pipistrellus		0/20	0/5		0/8								0/4			0/3		0/40 (0)
Pipistrellus abramus	0/1	0/62	0/2		0/32													0/97 (0)
Pipistrellus minus		0/4																0/4 (0)
Miniopterus fuliginosus		0/52			0/12	0/16					0/17							0/97 (0)
Miniopterus pusillus		0/196																0/196 (0)
Tylonycteris pachypus	0/88	0/54	0/51															0/193 (0)
Tylonycteris robustula	0/56		0/4															0/60 (0)
Taphozous melanopogon	0/4		0/206															0/210 (0)
Scotophilus heathi								0/1										0/1 (0)
Scotophilus kuhli		0/1	0/66															0/67 (0)
Megaderma lyra	0/2															0/1		0/3 (0)
Barbastella leucomelas															0/1			0/1 (0)
Barbastella beijingensis													0/20	0/3				0/23 (0)
Chaerephon plicata	0/64	0/14																0/78 (0)
Plecotus auritus															0/14			0/14 (0)
Nyctalus plancyi		0/1		0/31														0/32 (0)
Vespertilio sinensis				0/36														0/36 (0)
Ia io	0/7	0/42																0/49 (0)
Scotomanes ornatus		0/4																0/4 (0)
Murina cyclotis																0/1		0/1 (0)
Scotozous dormeri		0/1																0/1 (0)
Total (%)	0/591 (0)	0/1240 (0)	0/868 (0)	0/112 (0)	0/305 (0)	0/61 (0)	0/44 (0)	0/25 (0)	0/40 (0)	0/48 (0)	0/36 (0)	0/49 (0)	0/26 (0)	0/12 (0)	0/18 (0)	0/27 (0)	0/30 (0)	0/3532 (0)
