# Supplementary material for: Characterization of Novel Rhabdoviruses in Chinese Bats
Source: Viruses. 2021 Jan 5;13(1):64. doi: 10.3390/v13010064 (PMC7824899; doi:10.3390/v13010064)
Supplement: Supplementary file 1 [file viruses-13-00064-s001.zip › Table S3.xlsx]

## Sheet: Table S3
Table S3. Repartition of the different bat species tested in this study, according to the type of sample analyzed.
Family	Genus	Species	Brain sample no.	Saliva sample no.	Total
Pteropidae	Eonycteris	Eonycteris spelaea	64	100	164
	Rousettus	Rousettus amplexicaudatus	2	5	7
		Rousettus leschenaultii	5	57	62
		Rousettus sp.	83		83
	Cynopterus	Cynopterus sphinx	3	26	29
Rhinolophidae	Rhinolophus	Rhinolophus sinicus	176	371	547
		Rhinolophus pearsonii	15	16	31
		Rhinolophus macrotis	2	13	15
		Rhinolophus affinis	72	90	162
		Rhinolophus pusillus	27	319	346
		Rhinolophus blythi	3		3
		Rhinolophus monoceros	7		7
		Rhinolophus luctus	7		7
		Rhinolophus clivosus	4		4
		Rhinolophus ferrumequinum	1	99	100
		Rhinolophus thomasi	2		2
		Rhinolophus sp.	1		1
		Rhinolophus robinsoni		4	4
		Rhinolophus rex		14	14
Hipposideridae	Hipposideros	Hipposideros armiger	90	309	399
		Hipposideros larvatus	55	146	201
		Hipposideros pomona	66	85	151
		Hipposideros pratti	9	111	120
	Aselliscus	Aselliscus stoliczkanus	37	38	75
Vespertilionidae	Myotis	Myotis ricketti	67	216	283
		Myotis davidii	8	3	11
		Myotis chinensis	36	48	84
		Myotis daubentonii	2	49	51
		Myotis siligorensis		103	103
		Myotis longipes		16	16
		Myotis altarium		2	2
		Myotis annectans		1	1
		Myotis brandti		10	10
		Myotis laniger	10		10
		Myotis petax	5		5
		Myotis frater	2		2
		Myotis blythii	2	7	9
		Myotis fimbriatus	11	2	13
		Myotis sp.	24	65	89
	Pipistrellus	Pipistrellus pipistrellus	7	40	47
		Pipistrellus abramus	2	97	99
		Pipistrellus minus		4	4
		Pipistrellus pulveratus	1		1
	Tylonycteris	Tylonycteris pachypus	18	193	211
		Tylonycteris robustula	2	60	62
	Scotophilus	Scotophilus kuhli	1	67	68
		Scotophilus heathi	36	1	37
	Barbastella	Barbastella leucomelas		1	1
		Barbastella beijingensis		23	23
	Plecotus	Plecotus auritus		14	14
	Nyctalus	Nyctalus plancyi		32	32
	Vespertilio	Vespertilio sinensis	4	36	40
	Ia	Ia io	4	49	53
	Scotomanes	Scotomanes ornatus		4	4
	Murina	Murina cyclotis		1	1
	Scotozous	Scotozous dormeri		1	1
	Eptesicus	Eptesicus.sp	1		1
Miniopteridae	Miniopterus	Miniopterus schreibersii	51		51
		Miniopterus fuliginosus	16	97	113
		Miniopterus pusillus	2	196	198
Emballonuridae	Taphozous	Taphozous melanopogon		210	210
Molossidae	Chaerephon	Chaerephon plicata	1	78	79
Megadermatidae	Megaderma	Megaderma lyra		3	3
Total			1044	3532	4576
