# Supplementary material for: Characterization of Novel Rhabdoviruses in Chinese Bats
Source: Viruses. 2021 Jan 5;13(1):64. doi: 10.3390/v13010064 (PMC7824899; doi:10.3390/v13010064)
Supplement: Supplementary file 1 [file viruses-13-00064-s001.zip › Table S4.xlsx]

## Sheet: Table S4
Table S4 Primers designed for rhabdovirus genome determination.
Target samples	Primers	Sequences
958, 1127, 1017, D170001, D170022, D170190	KRV-L-1-1840-F	5' YMANGGDYTVACIATGGCIGATGA 3'
	KRV-L-1-4000-R	5' GNYTGRAACAKRAARTCAWARTT 3'
	KRV-L-1-1940-F	5' CAYATHGAYTAYGARAARTGGAAYAA 3'
	KRV-L-1-3720-R	5' TTDSTBTCYYTBTCCCAIGG 3'
958	958-N-32F	5' GCTAGGATGGCAGATGAATTGGA 3'
	958-L-385R	5' CATGCTTCTCGTCTAATCATCAACA 3'
	958-N-40F	5' GGCAGATGAATTGGATCAGATGTCTAAACCA 3'
	958-L-350R	5' TGTCCAGCCTTTATGTCTCAACCCTTCTAAAC 3'
	958-N-89F	5' GGAGATTCTTATGTTGCTTATATGCGAGAAATGGG 3'
	958-L-243R	5' CTGGCCGACCATTGTAATAAATCAGACTTTCTTC 3'
	958-N-184F	5' TGAGTCTTGAGCTTTTGCTTCAACA 3'
	958-N-997R	5' GCCTAACAAAGTCCCAACCACAT 3'
	958-N-957R	5' GGATTAGCCTGCGATGAGTAAGG 3'
	958-L-8167F	5' TTTCTTGTTCTCGACAAAGTTCAGG 3'
	958-L-10389R	5' ATAAGCTAAACCAGTTTCAACCC 3'
	958-L-10280R	5' GCCAATGCCCTATTAAATTCTTCTTCA 3'
	958-3'UTR F	5' AACGAGHVVTCAHVATGTC 3'
	958-N R1	5' ATGCCAAAACTTGTCCAATCTGT 3'
	958-N R2	5' AATCACCAGTTTCTAAACCGTAC 3'
	958-L-5'F1	5'ACTGGGAGTCTGTGACAGATACTTATATGC 3'
	958-L-5'F2	5'TGGCAATCAAACAATACCCGTTGTGGAAAG 3'
1127	1127-3500F	5' TGTGAYTTYMRDTGGTAYGG 3'
	1127-7000R	5' CTAACCCTCCCTTTTGTCCATCCC 3'
	1127-4160F	5' AYKCWYTNTGYCARRRHACHTGGGA 3'
	1127-6900R	5' ATTATAGTAAATTAAGCTTTGCTCA 3'
	1127-8200F	5' AGGTCAATGTGGAGGTGCTCTGC 3'
	1127-8300F	5' CCCCTAGAAATGCATGGAAAAGGT 3'
	1127-11080R	5' CKRATCCANTKYCCDATATTIGC 3'
	1127-8330F	5' GCCCAAAGTCTGGATTTGACTATAT 3'
	1127-11000R	5' GAGATGGTATTTCCCTTTAGATGA 3'
	1127-8400F	5' GGCAACAACCGATACCATGAGGGAA 3'
	1127-10138R	5' CAGGCAAGAAGACGGCAGGAATA 3'
	1127-3680F	5' TGTGAYTWYMGRTGGTAYGG
	1127-L R1	5' GAATAGGATTTGGTTCATCTTTA 3'
	1127-L R2	5' TTCTTGCCGTGCAAATCGAAGCT 3'
	1127-N-F	5' AAYCCNTGHTTYCAYTTYTGGGG 3'
	1127N R1	5' GCCTTGGTAATCATCAACTCCTA 3'
	1127-N-F'	5'ARNRAYBBNRYNGANTGGHTDGCNTGGT 3'
	1127N R2	5' GAAAGATGGAAATCCGACCCAAT 3'
	1127 5'F1	5' AGCGGGTAGACCTATACCAGAGT 3'
	1127 5'F2	5' TGTCATCTAAAGGGAAATACCATC 3'
	1127 3‘ terminal F1	5’ TTAACAGAGCTAAAAAATGTC 3’
	1127 3’ terminal R1	5' CGTAACATCAGAGCAGTCAG 3'
	1127 3’ terminal R2	5‘ CAGCCAAGTAAGGCATAAAT 3'
1017, D170001, D170022, D170190	other RhaV 3'UTR F	5' AACAAACCTCTGAAATCATTTATGC 3'
	other RhaV L gene R1	5' GCATCGGGTTGACTTTAGGGTGT 3'
	other RhaV L gene R2	5' CTCCATCAGTAAGCGGACGAAGT 3'
	other RhaV L gene R3	5' CAGATTGAATAGTCTCGTCCTTG 3'
	Rhabdo N-L fragment1 F1	5' GCTCAGACCACCGCTATCACTAT 3'
	Rhabdo N-L fragment1 R1	5' TCTAACCCACCAGCCTGTCCATT 3'
	Rhabdo N-L fragment1 F2	5' CCTCTGTCACTACTGAGAAGCACCTA 3'
	Rhabdo N-L fragment1 R2	5' CAGCCTGTCCATTCCAACAAACC 3'
1017	1017L F1	5' TGGAACCACTATCCCACA 3'
	1017L R1	5' CCTCCCACCAAACAGACA 3'
	1017L F2	5' AGTGGAGGCATTGGATTA 3'
	1017L R2	5' TCTCGGATGTATGGGAAC 3'
	1017 5'F1	5' GCCTGCTGACTTTATTCTGGCTTTGA 3'
	1017 5'F2	5' ACATCCGACTCTCAGACGAACCCCCC 3'
	1017-1F	5' GGATTCCCGTCTTTTTCT 3'
	1017-2R1	5' ATTGTCCCATGATGCTCA 3'
	1017-2R2	5' ACGCAGCTTCCATCTTGT 3'
D170001	DB170001 5'race F1(10077)	5' TTTGTTACAGATCGCCAATGTCC 3'
	DB170001 5'race F2(10130)	5' CCTGCTGACTTTATTCTGGCTTTG 3'
	DB170001 gap F	5' GCAATGAGGAGGTACATGCCCTTAT 3'
	DB170001 gap R	5' TGGTCCTGGACAAGATGACAATT 3'
D170022	22 N-F	5' GGAGTGAGATGGAGGAGGTAAATGT 3'
	22 N-R	5' ATTTTGAGCCCTGTTAGTTTTTTTC 3'
	22 5' F1	5' TCCACCCAGTGATGGTCTATCTAGTAAT 3'
	22 5' F2	5' CCTTGGGTTTGCGTATTCTATTATGTAT 3'
D170190	190 N-L F1	5' AGATGACTACTTGGGGCTTTATGTTG 3'
	190 N-L R1	5' CTTGAGCCAATGTTTTGACAGAGGTG 3'
	190 N-L F2	5' CACTGTGGCTGCCGAAAGACTCCCCC 3'
	190 N-L R2	5' CTAACCCACCAGCCTGTCCATTCCAA 3'
	190L F1	5' ACCACTATCCCACATCCC 3'
	190L R1	5' AGATCACCTGATTGTCCC 3'
	190L F2	5' AGGACATAGGAGTGGAGGCA 3'
	190L R2	5' CTAGCGATGACCAGCAAA 3'
	190 L-F1	5' ATCACATTGAAAAACTGCTGGAGGA 3'
	190 L-R1	5' CGGGGTATGCCAGATAACAACTTCAA 3'
	190 L-F2	5' AATCAAGACAAAAATCAAAGAAAAT 3'
	190 L-R2	5' AGCATACAAGCCCTCCCACCAAACAG 3'
	190 5'F1	5' GCTTTGATGGGTGTGATTTCTTACTATT 3'
	190 5'F2	5' GGGTGTGATTTCTTACTATTCCATTGAT 3'
	190Lgap-F1	5' AGATTGAGAGACGCCATTCAC 3'
	190Lgap-R1	5' GCCCTAGTCGGAGCCCAGATA 3'
	190Lgap-F2	5' GGTTTAAGAGAACAGGTTCTG 3'
	190Lgap-R2	5' GAGGGTTTGTATGCTAGTCGA 3'
	190L F1	5' GTTCTTTCCCTAAGTGGGGTCCG 3'
	190L R1	5' CTGTCGGTAATTGCCCTAGTCGG 3'
	190L F2	5' CCAACAATCTTCCCCTCCCACCC 3'
	190L R2	5' AATTGCCCTAGTCGGAGCCCAGA 3'
