# Supplementary material for: Characterization of Novel Rhabdoviruses in Chinese Bats
Source: Viruses. 2021 Jan 5;13(1):64. doi: 10.3390/v13010064 (PMC7824899; doi:10.3390/v13010064)
Supplement: Supplementary file 1 [file viruses-13-00064-s001.zip › Table S5.xlsx]

## Sheet: Table S5
Table S5. List of genome sequences of rhabdovirus used in this study (based on ICTV classification, 2018)
Virus (abbreviation)	Genus	Location of first isolation	Year of isolation	Host species	GenBank accession number
Coot Bay almendravirus (CBV)	Almendravirus	USA	2013	Mosquito (Anopheles quadrimaculatus)	NC031957
Balsa almendravirus (BALV)	Almendravirus	Colombia	2013	Mosquito (Psorophora albigenu)	NC039200
Arboretum almendravirus (ABTV)	Almendravirus	Peru	2009	Mosquito (Psorophora albigenu)	NC025393
Puerto Almendras almendravirus (PTAMV)	Almendravirus	Peru	2009	Mosquito (Ochlerotatus fulvus)	NC025395
Lepeophtheirus salmonis rhabdovirus No127 (LSRV127)	Caligrhavirus	Norway	2013	Salmon louse (Lepeophtheirus salmonis)	KJ958536
Itacaiunas curiovirus (ITAV)	Curiovirus	Brazil	1984	Midge (Culicoides sp.)	NC034536
Iriri curiovirus (IRIRV)	Curiovirus	Brazil	1982	Sandfly (Lutzomyia sp.)	NC034544
Curionopolis curiovirus (CURV)	Curiovirus	Brazil	1985	Midge (Culicoides sp.)	NC025354
Rochambeau curiovirus (RBUV)	Curiovirus	French Guiana	1973	Mosquito (Coquillettidia albicosta)	NC034534
Yata ephemerovirus (YATV)	Ephemerovirus	Central African Republic	1969	Mosquito (Mansonia uniformis)	NC028241
Koolpinyah ephemerovirus (KOOLV)	Ephemerovirus	Australia	1985	Bovine (Bos taurus)	NC028239
Kotonkan ephemerovirus (KOTV)	Ephemerovirus	Nigeria	1967	Midge (Culicoides sp.)	NC017714
Adelaide River ephemerovirus (ARV)	Ephemerovirus	Australia	1981	Bovine	NC028246
Obodhiang ephemerovirus (OBOV)	Ephemerovirus	Sudan	1963	Mosquito (Mansonia uniformis)	NC017685
Kimberley ephemerovirus (KIMV)	Ephemerovirus	Australia	1980	Bovine (Bos taurus)	NC025396
Bovine ephemeral fever ephemerovirus (BEFV)	Ephemerovirus	China	2002	Bovine	KY315724
Malakal ephemerovirus (MALV)	Ephemerovirus	Sudan	1963	Mosquito (Mansonia uniformis)	JQ941707
Berrimah ephemerovirus (BRMV)	Ephemerovirus	Australia	1981	Bovine (Bos taurus)	NC025358
Kotonkan ephemerovirus (KOTV)	Ephemerovirus	USA	2016	Tick (Ixodes scapularis)	MF615270
Ngaingan hapavirus (NGAV)	Hapavirus	Australia	1970	Midge	NC013955
Manitoba hapavirus (MANV)	Hapavirus	Canada	1977	Mosquito (Culex tarsalis)	NC034531
La Joya hapavirus (LJV)	Hapavirus	Panama	1958	Mosquito (Culex dunni)	NC034537
Wongabel hapavirus (WONV)	Hapavirus	Australia	1979	Midge (Culicoides austropalpalis)	NC011639
Ord River hapavirus (ORV)	Hapavirus	Australia	1976	Mosquito (Culex annulirostris)	KY421920
Parry Creek hapavirus (PCV)	Hapavirus	Australia	1973	Mosquito (Culex annulirostris)	NC034449
Joinjakaka hapavirus (JOIV)	Hapavirus	Papua-New Guinea	1966	Mosquitoe (Culicinae sp.)	NC034538
Marco hapavirus hapavirus (MCOV)	Hapavirus	Brazil	1962	Lizard (Ameiva ameiva ameiva)	NC034530
Gray Lodge hapavirus (GLOV)	Hapavirus	USA	1971	Mosquito (Culex tarsalis)	NC034541
Landjia hapavirus (LJAV)	Hapavirus	Central African Republic	1970	Bird (Riparia paludicola)	NC034533
Mosqueiro hapavirus (MQOV)	Hapavirus	Brazil	1970	Mosquito (Culex portesi)	NC034448
Hart Park hapavirus (HPV)	Hapavirus	USA	1955	Mosquito (Culex tarsalis)	NC034447
Kamese hapavirus (KAMV)	Hapavirus	Central African Republic	1977	Mosquito (Culex pruina)	KX497133
Mossuril hapavirus (MOSV)	Hapavirus	Mozambique	1959	Mosquito (Culex sitiens)	KM204993
Flanders hapavirus (FLAV)	Hapavirus	USA	1961	Mosquito (Culiseta melanura)	KM205002
Nkolbisson ledantevirus (NKOV)	Ledantevirus	Cameroon	1965	Mosquito (Eretmapodites leucopous)	NC034539
Kumasi ledantevirus(KRV)	Ledantevirus	Ghana	2011	Bat (Eidolon helvum)	NC028236
Le Dantec ledantevirus (LDV)	Ledantevirus	Senegal	1965	Human	NC034443
Kolente ledantevirus (KOLEV)	Ledantevirus	Guinea	1985	Tick / bat (Amblyomma variegatum / Hipposideros sp.)	NC025342
Kanyawara ledantevirus (KYAV)	Ledantevirus	Uganda	2010	Batfly (Dipseliopoda sp.)	NC039020
Vaprio ledantevirus (VAPV)	Ledantevirus	Italy	2016	Bat (Pipistrellus kuhlii)	MG021441
Nishimuro ledantevirus (NISV)	Ledantevirus	Japan	1962	Wild boar(Sus scrofa)	AB609604
Barur ledantevirus (BARV)	Ledantevirus	India	1962	Rat (Rattus rattus wroughtoni)	NC034535
Fukuoka ledantevirus (FUKV)	Ledantevirus	Japan	1982	Midge (Culicoides punctatus)	NC034454
Kern Canyon ledantevirus (KCV)	Ledantevirus	USA	1968	Bat (Myotis yumanensis)	NC034451
Keuraliba ledantevirus (KEUV)	Ledantevirus	Senegal	1968	Gerbil (Tatera kempi)	NC034540
Wuhan Louse Fly ledantevirus 5 (WLFV5)	Ledantevirus	China	2013	Fly(Hippoboscidae sp.)	NC031301
Mount Elgon bat ledantevirus (MEBV)	Ledantevirus	Kenya	1964	Bat (Rhinolophus hilderbrandtii eloquens)	NC034545
Oita ledantevirus (OITAV)	Ledantevirus	Japan	1972	Bat (Rhinolophus cornutus)	NC034548
Fikirini ledantevirus (FKRV)	Ledantevirus	Kenya	2011	Bat (Hipposideros commersoni)	NC025341
Yongjia Tick ledantevirus 2(YTV2)	Ledantevirus	China	2012	Tick(Haemaphysalis hystricis)	NC031305
Bughendera virus(BUGV)	Ledantevirus	Uganda	2017	Bayfly(Dipseliopoda sp.)	MT325641
Taiwan bat lyssavirus(TWBLV)	Lyssavirus	Taiwan	2016	Bat (Pipistrellus abramus)	MF472710
Ikoma lyssavirus (IKOV)	Lyssavirus	Tanzania	2009	African civet(Civettictis civetta)	NC018629
West Caucasian bat lyssavirus (WCBV)	Lyssavirus	Russia	2001	Bat (Miniopterus schreibersii)	NC025377
Shimoni bat lyssavirus (SBV)	Lyssavirus	Kenya	2009	Bat (Hipposideros commersoni )	NC025365
Lagos bat lyssavirus (LBV)	Lyssavirus	Ghana	2015	Bat (Eidolon helvum)	LN849915
Mokola lyssavirus (MOKV)	Lyssavirus	South Africa	1996	Feline	KF155008
Rabies lyssavirus (RABV)	Lyssavirus	France	1983	Human	EU293121
Lleida bat lyssavirus(LBLV)	Lyssavirus	Spain	2011	Bat (Miniopterus schreibersii)	NC031955
Aravan lyssavirus (ARAV)	Lyssavirus	Kyrgyzstan	1991	Bat (Myotis blythi)	NC020808
Khujand lyssavirus (KHUV)	Lyssavirus	Tajikstan	2001	Bat (Myotis mystacinus)	NC025385
European bat 2 lyssavirus (EBLV2)	Lyssavirus	United Kingdom	2016	Bat (Myotis daubentonii)	KY688156
Bokeloh bat lyssavirus(BBLV)	Lyssavirus	Germany	2010	Bat (Myotis nattererii)	NC025251
Australian bat lyssavirus (ABLV)	Lyssavirus	Australia	1996	Bat (Saccolaimus flaviventris)	NC003243
Irkut lyssavirus (IRKV)	Lyssavirus	Russia	2002	Bat (Murina leucogaster)	NC020809
Gannoruwa bat lyssavirus(GBLV)	Lyssavirus	Sri Lanka	2015	Bat (Pteropus giganteus)	NC031988
Duvenhage lyssavirus (DUVV)	Lyssavirus	South Africa	1971	Human	NC020810
European bat 1 lyssavirus (EBLV1)	Lyssavirus	Germany	1968	Bat (Eptesicus serotinus)	EF157976
Perch perhabdovirus (PRV)	Perhabdovirus	France	1981	Fish(Perca fluviatilis)	NC020803
Anguillid perhabdovirus (EVEX)	Perhabdovirus	Denmark	1986	Fish(Anguilla anguilla eels)	KC608035
Drosophila melanogaster sigmavirus (DMelSV)	Sigmavirus	USA	unknown	Fly	JX403934
Drosophila obscura sigmavirus (DObSV)	Sigmavirus	United Kingdom	2007	Fly (Drosophila obscura)	NC022580
Drosophila affinis sigmavirus(DAffSV)	Sigmavirus	USA	2007	Fly(Drosophila affinis)	KR822811
Pike fry sprivivirus (PFRV)	Sprivivirus	France	1972	Fish (Esox lucius)	NC025356
Carp sprivivirus(CSV)	Sprivivirus	China	2016	Fish (Grasscarp)	KY475636
Tench sprivivirus(TRV)	Sprivivirus	Germany	1982	Fish (Tinca tinca)	NC025371
Grass carp sprivivirus(GCRV)	Sprivivirus	Germany	1982	Fish (Ctenopharyngodon idella)	NC025376
Sena Madureira sripuvirus (SMV)	Sripuvirus	Brazil	1976	Lizard (Ameiva ameiva ameiva)	NC034529
Sripur sripuvirus (SRIV)	Sripuvirus	India	1973	Sandfly (Sergentomyia sp.)	NC034542
Oak Vale sripuvirus (OVRV)	Sripuvirus	Australia	1982	Mosquito (Culex edwardsi)	NC025399
Chaco sripuvirus (CHOV)	Sripuvirus	Brazil	1962	Lizard (Ameiva ameiva ameiva)	NC034550
Niakha sripuvirus (NIAV)	Sripuvirus	Senegal	1992	Sandfly (Phlebotomus duboscq and Sergentomyia sp.)	NC025405
Almpiwar sripuvirus (ALMV)	Sripuvirus	Australia	1966	Lizard (Cryptoblepharus virgatus)	NC025391
Ekpoma 2 tibrovirus (EKV2)	Tibrovirus	Nigeria	2011	Human	KP324828
Beatrice Hill tibrovirus (BHV)	Tibrovirus	Australia	1976	Culicoides peregrinus	NC039021
Bas Congo tibrovirus (BASV)	Tibrovirus	Democratic Republic of the Congo	2009	Human	JX297815
Coastal Plains tibrovirus (CPV)	Tibrovirus	Australia	1981	Bovine	NC025397
Sweetwater Branch tibrovirus (SWBV)	Tibrovirus	USA	1982	Midge (Culicoides insignis)	NC034546
Tibrogargan tibrovirus (TIBV)	Tibrovirus	Australia	1976	Midge (Culicoides brevitarsis)	NC020804
Ekpoma tibrovirus (EKV)	Tibrovirus	China	2017	Human	MF079256
Ekpoma 1 tibrovirus (EKV1)	Tibrovirus	Nigeria	2011	Human	KP324827
Bivens Arm tibrovirus (BAV)	Tibrovirus	USA	1982	Midge (Culicoides insignis)	KM205019
Durham tupavirus (DURV)	Tupavirus	USA	2005	Bird	FJ952155
Klamath tupavirus (KLAV)	Tupavirus	USA	1962	Vole (Microtus montanus)	NC034549
Tupaia tupavirus (TUPV)	Tupavirus	Thailand	1999	Tree shrew	NC007020
Jinghong bat vesiculovirus (JHBV_IH17)	Vesiculovirus	China	2011	Bat (Rhinolophus affinis)	MF279192
Radi vesiculovirus (RADIV)	Vesiculovirus	Italy	1982	Sandfly (Phlebotomus perfiliewi)	KM205024
Jurona vesiculovirus (JURV)	Vesiculovirus	Brazil	1962	Human	NC025392
Malpais Spring vesiculovirus (MSPV)	Vesiculovirus	USA	1985	Mosquito (Aedes campestris)	NC025364
Isfahan vesiculovirus (ISFV)	Vesiculovirus	Iran	1975	Sandfly (Phlebotomus papatasi)	NC020806
Perinet vesiculovirus (PERV)	Vesiculovirus	Madagascar	2008	Mosquito	NC025394
Chandipura vesiculovirus (CHNV)	Vesiculovirus	India	2004	Human	NC020805
VS New Jersey vesiculovirus (VSNJV)	Vesiculovirus	Honduras	1984	Bovine	NC024473
Carajas vesiculovirus (CARV)	Vesiculovirus	Brazil	1983	Sandfly (Lutzomyia sp.)	KM205015
Maraba vesiculovirus (MARAV)	Vesiculovirus	Brazil	1983	Sandfly	NC025255
Morreton vesiculovirus (MORV)	Vesiculovirus	Colombia	1986	Sandfly (Lutzomyia sp.)	NC034508
VS Indiana vesiculovirus (VSIV)	Vesiculovirus	USA	1998	Horse	NC001560
VS Alagoas vesiculovirus (VSAV)	Vesiculovirus	Brazil	1964	Mule	NC025353
Cocal vesiculovirus (COCV)	Vesiculovirus	Trinidad	1961	Rodent	EU373657
Yug Bogdanovac vesiculovirus (YBV)	Vesiculovirus	Serbia	2011	Vero-E6 cells	NC025378
American bat vesiculovirus (ABV)	Vesiculovirus	USA	2008	Bat (Eptesicus fuscus)	NC022755
Piry vesiculovirus (PIRV)	Vesiculovirus	Brazil	1960	Gray four-eyed opossums (Philander opossum)	KU178986
Sawgrass virus (SAWV)	Unclassified Rhabdoviridae	USA	1964	Tick (Dermacentor variabilis)	KM205013
Moussa virus (MOUV)	Unclassified Rhabdoviridae	Cote d'Ivoire	2004	Mosquito (Culex decens)	NC025359
Lone star tick rhabdovirus (LSTRV)	Unclassified Rhabdoviridae	USA	2009	Tick (Amblyomma americanum)	KU127239
Huangpi Tick Virus 3 (HTV3)	Unclassified Rhabdoviridae	China	2012	Tick (Haemaphysalis doenitzi)	NC031083
Tacheng Tick Virus 3 (TTV3)	Unclassified Rhabdoviridae	China	2013	Tick (Dermacentor marginatus)	NC031268
Muir Springs virus (MSV)	Unclassified Rhabdoviridae	USA	1976	Mosquito (Aedes sp.)	KM204990
Harlingen virus (HARV)	Unclassified Rhabdoviridae	USA	2001	Mosquito (Culex salinarius)	KM205003
Bahia Grande virus (BGV)	Unclassified Rhabdoviridae	USA	1974	Mosquito (Ochlerotatus sollicitans)	KM205018
Bole Tick Virus 2 (BTV2)	Unclassified Rhabdoviridae	China	2012	Tick (Hyalomma asiaticum)	NC031079
Zahedan rhabdovirus (ZRV)	Unclassified Rhabdoviridae	Iran	2001	Vero E6 cells	KJ830812
Shayang Fly Virus 2 (SFV2)	Unclassified Rhabdoviridae	China	2012	Fly (Musca domestica)	NC031215
Ohlsdorf virus (OHLV)	Unclassified Rhabdoviridae	Germany	2012	Mosquito (Ochlerotatus cantans)	KY768856
Merida virus (MERV)	Unclassified Rhabdoviridae	USA	2015	Mosquito (Culex quinquefasciatus)	MH310083
Wuhan Louse Fly Virus 10 (WLFV10)	Unclassified Rhabdoviridae	China	2013	Biting fly (Hippoboscidae sp.)	NC031240
Culex rhabdovirus (CRV)	Unclassified Rhabdoviridae	USA	2016	Mosquito (Culex sp.)	MH188000
Pararge aegeria rhabdovirus (PARV)	Unclassified Rhabdoviridae	UK	2015	Butterfly (Pararge aegeria)	KR822826
Gata virus (GATV)	Unclassified Rhabdoviridae	USA	2016	Butterfly (Orgyia pseudotsugata)	NC031691
Wuhan Fly Virus 2 (WFV2)	Unclassified Rhabdoviridae	China	2013	Fly (Musca domestica)	NC031278
New Minto virus (NMV)	Unclassified Rhabdoviridae	USA	1972	Rabbit tick (Haemaphysalis leporispalustris)	KM205009
Connecticut virus (CONV)	Unclassified Rhabdoviridae	USA	1978	Tick (Ixodes dentatus)	KM205020
Long Island tick rhabdovirus (LITRV)	Unclassified Rhabdoviridae	USA	2013	Tick (Amblyomma americanum)	NC025340
Orgi virus (ORGV)	Unclassified Rhabdoviridae	USA	2016	Butterfly (Orgyia pseudotsugata)	NC031690
Culex tritaeniorhynchus rhabdovirus (CTRV)	Unclassified Rhabdoviridae	Japan	2010	Mosquito (Culex tritaeniorhynchus)	NC025384
Riverside virus 1 (RIVV1)	Unclassified Rhabdoviridae	Hungary	2014	Mosquito (Ochlerotatus sp.)	KU248085
North Creek virus (NCV)	Unclassified Rhabdoviridae	Australia	1997	Mosquito (Culex sitiens)	KF360973
Wuhan Insect virus 7 (WHIV7)	Unclassified Rhabdoviridae	China	2013	Bug (Hyalopterus pruni)	NC031236
Holmes Jungle virus (HJV)	Unclassified Rhabdoviridae	Australia	1987	Mosquito (Culex annulirostris)	KY421919
Scophthalmus maximus rhabdovirus (SMRV)	Unclassified Rhabdoviridae	China	2010	Fish (Scophthalmus maximus)	NC025387
Santa barbara virus (SABV)	Unclassified Rhabdoviridae	Brazil	2010	Fly (Psychodidae sp.)	NC028234
Inhangapi virus (INHV)	Unclassified Rhabdoviridae	Brazil	1969	Sand fly (Lutzomyia flaviscutellata)	NC028230
Aruac virus (ARUV)	Unclassified Rhabdoviridae	Trinidad and Tobago	1955	Mosquito (Trichoprosopon theobaldi)	KM204987
Xiburema virus (XIBV)	Unclassified Rhabdoviridae	Brazil	1974	Mosquito (Sabethes intermedius)	NC025362
Wuhan House Fly Virus 1 (WHFV1)	Unclassified Rhabdoviridae	China	2013	Fly (Musca domestica)	KM817648
Hainan black-spectacled toad dimarhabdovirus (HBTDRV)	Unclassified Rhabdoviridae	China	2017	Asian common toad (Duttaphrynus melanostictus)	MG600016
Sunguru virus (SUNV)	Unclassified Rhabdoviridae	Uganda	2013	Chicken	NC025401
Dolphin rhabdovirus (DRV)	Unclassified Rhabdoviridae	Netherlands	1992	White-beaked dolphin (Lagenorhynchus albirostris)	NC025406
Eelpout rhabdovirus (ERV)	Unclassified Rhabdoviridae	Sweden	2014	Viviparous eelpout (Zoarces viviparus)	KR612230
Harrison Dam virus (HDV)	Unclassified Rhabdoviridae	Australia	1975	Mosquito (Culex annulirostris)	KJ432573
Walkabout Creek virus (WCV)	Unclassified Rhabdoviridae	Australia	1981	Midge larvae (Culicoides austropalpalis)	NC028232
Garba virus (GARV)	Unclassified Rhabdoviridae	Central African Republic	1970	Bird (Corythornis cristata)	KM204982
Kwatta virus (KWAV)	Unclassified Rhabdoviridae	Suriname	1964	Mosquito (Culex sp.)	KM204985
Dillard's Draw virus (DDV)	Unclassified Rhabdoviridae	USA	2015	Mosquito (Culex tarsalis)	MG251664
Menghai rhabdovirus (MRV)	Unclassified Rhabdoviridae	Japan	2017	Aedes albopictus cultured cell line C6/36	LC270812
Siniperca chuatsi rhabdovirus (SCRV)	Unclassified Rhabdoviridae	China	Unknown	Fish (Siniperca chuatsi )	NC008514
