# Supplementary material for: Characterization of Novel Rhabdoviruses in Chinese Bats
Source: Viruses. 2021 Jan 5;13(1):64. doi: 10.3390/v13010064 (PMC7824899; doi:10.3390/v13010064)
Supplement: Supplementary file 1 [file viruses-13-00064-s001.zip › Table S6.xlsx]

## Sheet: Table S6
Table S6. Bat species with paired samples (brain and saliva).
Bat species	Chinese province
	Yuannan	Hubei	Total
Frugivorous
Rousettus leschenaultii	32		32
Eonycteris spelaea	29		29
Insectivorous
Rhinolophus sinicus		29	29
Rhinolophus pusillus	31		31
Rhinolophus luctus	1		1
Hipposideros armiger		1	1
Aselliscus stoliczkanus	16		16
Myotis laniger	5		5
Total	114	30	144
