# Supplementary material for: Characterization of Novel Rhabdoviruses in Chinese Bats
Source: Viruses. 2021 Jan 5;13(1):64. doi: 10.3390/v13010064 (PMC7824899; doi:10.3390/v13010064)
Supplement: Supplementary file 1 [file viruses-13-00064-s001.zip › Table S7.pdf]

**Table S7.** Amino acid identities of each canonical proteins (N, P, M, G and L) of isolates, 1017, D170001, D170022 and D170190 (putative species YSBV) and isolate 1127 (putative species TYBV) within the *Vesiculovirus* genus. Identities were calculated as pairwise deletion using MEGA7.0. Rhabdovirus isolates described in this study are underlined.

| Protein        | Pairwise amino acid identity (%) |      |         |         |         |      |     |     |       |      |      |      |      |      |      |       |      |      |      |       |      |      |
|----------------|----------------------------------|------|---------|---------|---------|------|-----|-----|-------|------|------|------|------|------|------|-------|------|------|------|-------|------|------|
|                | 1127                             | 1017 | D170001 | D170022 | D170190 | IH17 | ABV | YBV | RADIV | PERV | CHNV | PIRV | ISFV | JURV | MSPV | VSNJV | CARV | VSAV | COCV | MARAV | VSIV | MORV |
| N protein      |                                  |      |         |         |         |      |     |     |       |      |      |      |      |      |      |       |      |      |      |       |      |      |
| <u>1127</u>    |                                  |      |         |         |         |      |     |     |       |      |      |      |      |      |      |       |      |      |      |       |      |      |
| <u>1017</u>    | 90                               |      |         |         |         |      |     |     |       |      |      |      |      |      |      |       |      |      |      |       |      |      |
| <u>D170001</u> | 90                               | 100  |         |         |         |      |     |     |       |      |      |      |      |      |      |       |      |      |      |       |      |      |
| <u>D170022</u> | 90                               | 100  | 100     |         |         |      |     |     |       |      |      |      |      |      |      |       |      |      |      |       |      |      |
| <u>D170190</u> | 90                               | 100  | 100     | 100     |         |      |     |     |       |      |      |      |      |      |      |       |      |      |      |       |      |      |
| IH17           | 100                              | 90   | 90      | 90      | 90      |      |     |     |       |      |      |      |      |      |      |       |      |      |      |       |      |      |
| ABV            | 55                               | 55   | 55      | 55      | 55      | 55   |     |     |       |      |      |      |      |      |      |       |      |      |      |       |      |      |
| YBV            | 48                               | 48   | 48      | 48      | 48      | 48   | 49  |     |       |      |      |      |      |      |      |       |      |      |      |       |      |      |
| RADIV          | 44                               | 47   | 47      | 47      | 47      | 45   | 49  | 75  |       |      |      |      |      |      |      |       |      |      |      |       |      |      |
| PERV           | 49                               | 51   | 51      | 51      | 51      | 49   | 54  | 56  | 59    |      |      |      |      |      |      |       |      |      |      |       |      |      |
| CHNV           | 43                               | 44   | 44      | 44      | 44      | 43   | 48  | 50  | 52    | 59   |      |      |      |      |      |       |      |      |      |       |      |      |
| PIRV           | 45                               | 47   | 47      | 47      | 47      | 45   | 49  | 52  | 54    | 68   | 56   |      |      |      |      |       |      |      |      |       |      |      |
| ISFV           | 45                               | 47   | 47      | 47      | 47      | 45   | 49  | 54  | 55    | 63   | 59   | 62   |      |      |      |       |      |      |      |       |      |      |
| JURV           | 47                               | 48   | 48      | 48      | 48      | 47   | 50  | 54  | 57    | 67   | 62   | 63   | 67   |      |      |       |      |      |      |       |      |      |
| MSPV           | 47                               | 48   | 48      | 48      | 48      | 47   | 48  | 53  | 56    | 70   | 59   | 62   | 66   | 71   |      |       |      |      |      |       |      |      |
| VSNJV          | 47                               | 48   | 48      | 48      | 48      | 47   | 47  | 54  | 56    | 62   | 51   | 52   | 53   | 55   | 56   |       |      |      |      |       |      |      |
| CARV           | 46                               | 46   | 46      | 46      | 46      | 46   | 47  | 54  | 55    | 60   | 51   | 50   | 51   | 53   | 56   | 73    |      |      |      |       |      |      |
| VSAV           | 47                               | 47   | 47      | 47      | 47      | 46   | 45  | 54  | 56    | 60   | 49   | 52   | 52   | 55   | 55   | 69    | 75   |      |      |       |      |      |
| COCV           | 47                               | 47   | 47      | 47      | 47      | 47   | 46  | 53  | 54    | 60   | 49   | 52   | 51   | 53   | 56   | 70    | 74   | 85   |      |       |      |      |
| MARAV          | 46                               | 46   | 46      | 46      | 46      | 46   | 46  | 53  | 56    | 61   | 51   | 52   | 51   | 54   | 56   | 70    | 73   | 82   | 87   |       |      |      |
| VSIV           | 48                               | 48   | 48      | 48      | 48      | 48   | 46  | 54  | 57    | 60   | 51   | 53   | 52   | 55   | 56   | 69    | 76   | 85   | 84   | 90    |      |      |
| MORV           | 47                               | 48   | 48      | 48      | 48      | 47   | 47  | 53  | 55    | 60   | 51   | 53   | 52   | 55   | 55   | 69    | 75   | 83   | 83   | 89    | 91   |      |
| P protein      |                                  |      |         |         |         |      |     |     |       |      |      |      |      |      |      |       |      |      |      |       |      |      |
| <u>1127</u>    |                                  |      |         |         |         |      |     |     |       |      |      |      |      |      |      |       |      |      |      |       |      |      |
| <u>1017</u>    | 49                               |      |         |         |         |      |     |     |       |      |      |      |      |      |      |       |      |      |      |       |      |      |
| <u>D170001</u> | 49                               | 100  |         |         |         |      |     |     |       |      |      |      |      |      |      |       |      |      |      |       |      |      |
| <u>D170022</u> | 49                               | 100  | 100     |         |         |      |     |     |       |      |      |      |      |      |      |       |      |      |      |       |      |      |
| <u>D170190</u> | 49                               | 98   | 98      | 98      |         |      |     |     |       |      |      |      |      |      |      |       |      |      |      |       |      |      |
| IH17           | 87                               | 52   | 52      | 52      | 51      |      |     |     |       |      |      |      |      |      |      |       |      |      |      |       |      |      |

|       |    |    |    |    |    |    |    |    |    |    |    |    |    |    |    |    |    |    |    |    |    |  |
|-------|----|----|----|----|----|----|----|----|----|----|----|----|----|----|----|----|----|----|----|----|----|--|
| ABV   | 11 | 9  | 9  | 9  | 9  | 11 |    |    |    |    |    |    |    |    |    |    |    |    |    |    |    |  |
| YBV   | 16 | 15 | 15 | 15 | 14 | 16 | 17 |    |    |    |    |    |    |    |    |    |    |    |    |    |    |  |
| RADIV | 13 | 11 | 11 | 11 | 11 | 13 | 16 | 41 |    |    |    |    |    |    |    |    |    |    |    |    |    |  |
| PERV  | 14 | 15 | 15 | 15 | 14 | 13 | 20 | 16 | 17 |    |    |    |    |    |    |    |    |    |    |    |    |  |
| CHNV  | 14 | 13 | 13 | 13 | 12 | 14 | 18 | 18 | 18 | 29 |    |    |    |    |    |    |    |    |    |    |    |  |
| PIRV  | 15 | 17 | 17 | 17 | 16 | 14 | 18 | 17 | 18 | 31 | 29 |    |    |    |    |    |    |    |    |    |    |  |
| ISFV  | 15 | 17 | 17 | 17 | 17 | 15 | 17 | 18 | 14 | 31 | 27 | 29 |    |    |    |    |    |    |    |    |    |  |
| JURV  | 12 | 13 | 13 | 13 | 12 | 13 | 20 | 18 | 19 | 35 | 26 | 34 | 32 |    |    |    |    |    |    |    |    |  |
| MSPV  | 14 | 13 | 13 | 13 | 13 | 15 | 20 | 14 | 18 | 28 | 28 | 24 | 21 | 24 |    |    |    |    |    |    |    |  |
| VSNJV | 15 | 14 | 14 | 14 | 13 | 15 | 17 | 11 | 16 | 23 | 16 | 22 | 18 | 22 | 16 |    |    |    |    |    |    |  |
| CARV  | 14 | 14 | 14 | 14 | 13 | 14 | 18 | 14 | 19 | 19 | 20 | 27 | 19 | 20 | 20 | 40 |    |    |    |    |    |  |
| VSAV  | 15 | 14 | 14 | 14 | 14 | 17 | 18 | 18 | 17 | 23 | 22 | 18 | 20 | 15 | 21 | 35 | 47 |    |    |    |    |  |
| COCV  | 16 | 15 | 15 | 15 | 15 | 17 | 22 | 19 | 18 | 22 | 22 | 19 | 18 | 19 | 22 | 36 | 47 | 61 |    |    |    |  |
| MARAV | 16 | 15 | 15 | 15 | 15 | 18 | 19 | 19 | 18 | 20 | 19 | 22 | 17 | 16 | 20 | 36 | 49 | 60 | 63 |    |    |  |
| VSIV  | 15 | 16 | 16 | 16 | 16 | 17 | 19 | 20 | 18 | 20 | 21 | 21 | 19 | 18 | 20 | 33 | 48 | 55 | 59 | 63 |    |  |
| MORV  | 17 | 14 | 14 | 14 | 14 | 18 | 20 | 18 | 19 | 20 | 19 | 21 | 17 | 17 | 20 | 34 | 48 | 56 | 63 | 66 | 69 |  |

# M protein

|                |    |     |     |     |    |    |    |    |    |    |    |    |    |    |    |    |    |    |    |    |    |  |
|----------------|----|-----|-----|-----|----|----|----|----|----|----|----|----|----|----|----|----|----|----|----|----|----|--|
| <u>1127</u>    |    |     |     |     |    |    |    |    |    |    |    |    |    |    |    |    |    |    |    |    |    |  |
| <u>1017</u>    | 74 |     |     |     |    |    |    |    |    |    |    |    |    |    |    |    |    |    |    |    |    |  |
| <u>D170001</u> | 74 | 100 |     |     |    |    |    |    |    |    |    |    |    |    |    |    |    |    |    |    |    |  |
| <u>D170022</u> | 74 | 100 | 100 |     |    |    |    |    |    |    |    |    |    |    |    |    |    |    |    |    |    |  |
| <u>D170190</u> | 74 | 100 | 100 | 100 |    |    |    |    |    |    |    |    |    |    |    |    |    |    |    |    |    |  |
| IH17           | 95 | 75  | 75  | 75  | 75 |    |    |    |    |    |    |    |    |    |    |    |    |    |    |    |    |  |
| ABV            | 41 | 43  | 43  | 43  | 43 | 42 |    |    |    |    |    |    |    |    |    |    |    |    |    |    |    |  |
| YBV            | 24 | 25  | 25  | 25  | 25 | 24 | 28 |    |    |    |    |    |    |    |    |    |    |    |    |    |    |  |
| RADIV          | 23 | 25  | 25  | 25  | 25 | 23 | 30 | 56 |    |    |    |    |    |    |    |    |    |    |    |    |    |  |
| PERV           | 22 | 24  | 24  | 24  | 24 | 22 | 26 | 29 | 29 |    |    |    |    |    |    |    |    |    |    |    |    |  |
| CHNV           | 24 | 25  | 25  | 25  | 25 | 23 | 31 | 32 | 33 | 42 |    |    |    |    |    |    |    |    |    |    |    |  |
| PIRV           | 25 | 30  | 30  | 30  | 30 | 25 | 34 | 34 | 31 | 51 | 44 |    |    |    |    |    |    |    |    |    |    |  |
| ISFV           | 25 | 26  | 26  | 26  | 26 | 26 | 31 | 35 | 35 | 51 | 51 | 52 |    |    |    |    |    |    |    |    |    |  |
| JURV           | 24 | 27  | 27  | 27  | 27 | 24 | 30 | 33 | 31 | 50 | 49 | 50 | 54 |    |    |    |    |    |    |    |    |  |
| MSPV           | 26 | 28  | 28  | 28  | 28 | 27 | 28 | 30 | 33 | 43 | 38 | 44 | 45 | 42 |    |    |    |    |    |    |    |  |
| VSNJV          | 22 | 20  | 20  | 20  | 20 | 23 | 22 | 25 | 25 | 33 | 28 | 29 | 31 | 33 | 28 |    |    |    |    |    |    |  |
| CARV           | 22 | 24  | 24  | 24  | 24 | 22 | 23 | 21 | 26 | 29 | 27 | 26 | 27 | 31 | 28 | 55 |    |    |    |    |    |  |
| VSAV           | 23 | 22  | 22  | 22  | 22 | 23 | 26 | 25 | 26 | 32 | 30 | 31 | 31 | 30 | 31 | 61 | 56 |    |    |    |    |  |
| COCV           | 24 | 23  | 23  | 23  | 23 | 24 | 24 | 24 | 25 | 30 | 29 | 31 | 32 | 29 | 29 | 61 | 58 | 81 |    |    |    |  |
| MARAV          | 24 | 22  | 22  | 22  | 22 | 24 | 23 | 25 | 27 | 31 | 32 | 31 | 32 | 32 | 29 | 64 | 58 | 77 | 80 |    |    |  |
| VSIV           | 23 | 23  | 23  | 23  | 23 | 24 | 22 | 25 | 25 | 29 | 29 | 31 | 31 | 30 | 31 | 63 | 56 | 75 | 75 | 80 |    |  |
| MORV           | 23 | 23  | 23  | 23  | 23 | 23 | 23 | 24 | 26 | 30 | 32 | 31 | 30 | 32 | 30 | 63 | 61 | 77 | 79 | 83 | 83 |  |

# G protein

[illegible]

|       |    |    |    |    |    |    |    |    |    |    |    |    |    |    |    |    |    |    |    |    |    |
|-------|----|----|----|----|----|----|----|----|----|----|----|----|----|----|----|----|----|----|----|----|----|
| COCV  | 53 | 54 | 54 | 54 | 54 | 53 | 54 | 58 | 58 | 58 | 58 | 58 | 59 | 58 | 59 | 66 | 69 | 78 |    |    |    |
| MARAV | 52 | 53 | 53 | 53 | 53 | 52 | 53 | 58 | 57 | 58 | 59 | 57 | 59 | 58 | 59 | 66 | 69 | 77 | 79 |    |    |
| VSIV  | 53 | 52 | 52 | 52 | 52 | 52 | 54 | 57 | 57 | 58 | 59 | 58 | 59 | 59 | 59 | 66 | 70 | 76 | 77 | 78 |    |
| MORV  | 54 | 53 | 53 | 53 | 53 | 53 | 54 | 58 | 57 | 59 | 59 | 58 | 59 | 58 | 59 | 66 | 69 | 75 | 77 | 79 | 80 |

---
