# Supplementary material for: Characterization of Novel Rhabdoviruses in Chinese Bats
Source: Viruses. 2021 Jan 5;13(1):64. doi: 10.3390/v13010064 (PMC7824899; doi:10.3390/v13010064)
Supplement: Supplementary file 1 [file viruses-13-00064-s001.zip › Table S8.pdf]

**Table S8.** Amino acid identities of each canonical proteins (N, P, M, G and L) of isolate 958 (putative species QZBV) within the *Ledantevirus* genus. Identities were calculated as pairwise deletion using MEGA7.0. Rhabdovirus isolate described in this study is underlined.

[illegible]

|       |    |    |    |    |    |    |    |    |    |    |    |    |    |    |    |    |
|-------|----|----|----|----|----|----|----|----|----|----|----|----|----|----|----|----|
| KOLEV | 19 | 22 | 20 | 23 | 23 | 20 |    |    |    |    |    |    |    |    |    |    |
| FKRV  | 18 | 17 | 20 | 22 | 23 | 18 | 52 |    |    |    |    |    |    |    |    |    |
| KCV   | 16 | 18 | 18 | 15 | 16 | 17 | 16 | 15 |    |    |    |    |    |    |    |    |
| VAPV  | 15 | 17 | 18 | 16 | 16 | 18 | 19 | 17 | 33 |    |    |    |    |    |    |    |
| LDV   | 14 | 18 | 17 | 18 | 13 | 18 | 19 | 17 | 29 | 35 |    |    |    |    |    |    |
| KEUV  | 14 | 15 | 18 | 17 | 14 | 18 | 17 | 15 | 30 | 38 | 58 |    |    |    |    |    |
| YTV2  | 16 | 16 | 15 | 17 | 17 | 17 | 14 | 15 | 24 | 23 | 22 | 22 |    |    |    |    |
| NKOV  | 15 | 17 | 18 | 16 | 16 | 16 | 18 | 14 | 19 | 23 | 19 | 20 | 23 |    |    |    |
| NISV  | 17 | 19 | 21 | 19 | 18 | 20 | 18 | 15 | 19 | 20 | 19 | 21 | 26 | 40 |    |    |
| BARV  | 16 | 17 | 18 | 17 | 16 | 17 | 18 | 15 | 18 | 19 | 19 | 21 | 26 | 42 | 73 |    |
| FUKV  | 17 | 19 | 20 | 17 | 16 | 18 | 18 | 16 | 20 | 20 | 19 | 21 | 24 | 42 | 73 | 81 |

#### M protein

|            |    |    |    |    |    |    |    |    |    |    |    |    |    |    |    |    |
|------------|----|----|----|----|----|----|----|----|----|----|----|----|----|----|----|----|
| <u>958</u> |    |    |    |    |    |    |    |    |    |    |    |    |    |    |    |    |
| MEBV       | 66 |    |    |    |    |    |    |    |    |    |    |    |    |    |    |    |
| KYAV       | 46 | 48 |    |    |    |    |    |    |    |    |    |    |    |    |    |    |
| WLFV5      | 53 | 49 | 44 |    |    |    |    |    |    |    |    |    |    |    |    |    |
| OITAV      | 36 | 36 | 35 | 38 |    |    |    |    |    |    |    |    |    |    |    |    |
| KRV        | 36 | 36 | 32 | 37 | 47 |    |    |    |    |    |    |    |    |    |    |    |
| KOLEV      | 38 | 36 | 34 | 39 | 54 | 48 |    |    |    |    |    |    |    |    |    |    |
| FKRV       | 40 | 38 | 38 | 39 | 54 | 46 | 66 |    |    |    |    |    |    |    |    |    |
| KCV        | 32 | 30 | 27 | 30 | 29 | 29 | 32 | 29 |    |    |    |    |    |    |    |    |
| VAPV       | 31 | 30 | 29 | 30 | 25 | 22 | 28 | 26 | 46 |    |    |    |    |    |    |    |
| LDV        | 28 | 29 | 25 | 31 | 28 | 25 | 29 | 25 | 44 | 57 |    |    |    |    |    |    |
| KEUV       | 25 | 28 | 24 | 28 | 25 | 27 | 27 | 27 | 42 | 52 | 64 |    |    |    |    |    |
| YTV2       | 37 | 38 | 34 | 33 | 32 | 34 | 30 | 30 | 32 | 31 | 31 | 30 |    |    |    |    |
| NKOV       | 39 | 36 | 36 | 33 | 35 | 34 | 36 | 34 | 30 | 29 | 25 | 28 | 50 |    |    |    |
| NISV       | 39 | 41 | 37 | 36 | 33 | 32 | 35 | 33 | 32 | 33 | 29 | 31 | 57 | 67 |    |    |
| BARV       | 39 | 40 | 35 | 36 | 33 | 32 | 34 | 33 | 30 | 32 | 26 | 29 | 57 | 70 | 87 |    |
| FUKV       | 40 | 42 | 34 | 36 | 33 | 32 | 34 | 33 | 30 | 32 | 27 | 29 | 56 | 69 | 87 | 96 |

#### G protein

|            |    |
|------------|----|
| <u>958</u> |    |
| MEBV       | 64 |

|       |    |    |    |    |    |    |    |    |    |    |    |    |    |    |    |    |
|-------|----|----|----|----|----|----|----|----|----|----|----|----|----|----|----|----|
| KYAV  | 47 | 47 |    |    |    |    |    |    |    |    |    |    |    |    |    |    |
| WLFV5 | 45 | 44 | 43 |    |    |    |    |    |    |    |    |    |    |    |    |    |
| OITAV | 31 | 29 | 30 | 30 |    |    |    |    |    |    |    |    |    |    |    |    |
| KRV   | 26 | 26 | 28 | 25 | 33 |    |    |    |    |    |    |    |    |    |    |    |
| KOLEV | 31 | 30 | 31 | 31 | 39 | 33 |    |    |    |    |    |    |    |    |    |    |
| FKRV  | 32 | 32 | 29 | 29 | 43 | 32 | 51 |    |    |    |    |    |    |    |    |    |
| KCV   | 30 | 31 | 30 | 31 | 25 | 26 | 27 | 25 |    |    |    |    |    |    |    |    |
| VAPV  | 33 | 32 | 31 | 30 | 26 | 25 | 27 | 27 | 51 |    |    |    |    |    |    |    |
| LDV   | 30 | 31 | 29 | 29 | 24 | 25 | 27 | 27 | 49 | 58 |    |    |    |    |    |    |
| KEUV  | 31 | 30 | 30 | 30 | 26 | 25 | 26 | 26 | 49 | 57 | 70 |    |    |    |    |    |
| YTV2  | 29 | 31 | 29 | 29 | 27 | 25 | 27 | 27 | 37 | 36 | 33 | 34 |    |    |    |    |
| NKOV  | 30 | 28 | 29 | 31 | 26 | 23 | 27 | 26 | 32 | 34 | 31 | 32 | 40 |    |    |    |
| NISV  | 30 | 28 | 29 | 29 | 25 | 24 | 26 | 24 | 33 | 33 | 31 | 32 | 39 | 49 |    |    |
| BARV  | 29 | 27 | 29 | 28 | 25 | 24 | 26 | 25 | 33 | 34 | 31 | 31 | 39 | 47 | 78 |    |
| FUKV  | 31 | 29 | 29 | 29 | 24 | 25 | 26 | 24 | 34 | 33 | 32 | 32 | 41 | 47 | 78 | 85 |

# L protein

958

|       |    |    |    |    |    |    |    |    |    |    |    |    |    |    |    |    |
|-------|----|----|----|----|----|----|----|----|----|----|----|----|----|----|----|----|
| MEBV  | 76 |    |    |    |    |    |    |    |    |    |    |    |    |    |    |    |
| KYAV  | 63 | 64 |    |    |    |    |    |    |    |    |    |    |    |    |    |    |
| WLFV5 | 61 | 62 | 59 |    |    |    |    |    |    |    |    |    |    |    |    |    |
| OITAV | 55 | 55 | 53 | 55 |    |    |    |    |    |    |    |    |    |    |    |    |
| KRV   | 55 | 56 | 55 | 55 | 63 |    |    |    |    |    |    |    |    |    |    |    |
| KOLEV | 55 | 55 | 54 | 54 | 62 | 63 |    |    |    |    |    |    |    |    |    |    |
| FKRV  | 53 | 55 | 53 | 54 | 62 | 62 | 75 |    |    |    |    |    |    |    |    |    |
| KCV   | 48 | 49 | 48 | 48 | 49 | 49 | 49 | 48 |    |    |    |    |    |    |    |    |
| VAPV  | 50 | 50 | 49 | 50 | 50 | 50 | 50 | 49 | 63 |    |    |    |    |    |    |    |
| LDV   | 48 | 49 | 48 | 49 | 48 | 49 | 48 | 47 | 63 | 69 |    |    |    |    |    |    |
| KEUV  | 49 | 49 | 48 | 49 | 48 | 49 | 49 | 48 | 63 | 70 | 81 |    |    |    |    |    |
| YTV2  | 48 | 47 | 49 | 47 | 47 | 48 | 48 | 47 | 50 | 49 | 50 | 50 |    |    |    |    |
| NKOV  | 50 | 49 | 48 | 48 | 48 | 47 | 48 | 47 | 51 | 51 | 51 | 51 | 55 |    |    |    |
| NISV  | 49 | 49 | 49 | 48 | 48 | 47 | 48 | 48 | 51 | 51 | 50 | 51 | 54 | 61 |    |    |
| BARV  | 49 | 49 | 49 | 48 | 48 | 48 | 47 | 48 | 50 | 51 | 50 | 51 | 54 | 61 | 88 |    |
| FUKV  | 49 | 49 | 49 | 48 | 48 | 48 | 48 | 48 | 51 | 51 | 50 | 51 | 54 | 62 | 89 | 92 |
