# Supplementary material for: Characterization of Novel Rhabdoviruses in Chinese Bats
Source: Viruses. 2021 Jan 5;13(1):64. doi: 10.3390/v13010064 (PMC7824899; doi:10.3390/v13010064)
Supplement: Supplementary file 1 [file viruses-13-00064-s001.zip › Table S9.xlsx]

## Sheet: Table S9
Table S9. Bat rhabdovirus screening by specific SYBR Green RT-qPCRs for different bat samples of Rhinolophus sinicus and Rhinolophus affinis originated from Hubei and Hainan provinces (All negative).
Samples	Date of collection (month/year)	Rhinolophus affinis	Rhinolophus sinicus	Rhinolophus sinicus	Total
		(Hainan, Qiongzhong)	(Hubei, Taiyi)	(Hubei, Yinshui)
Bat brain	08/2006		4		4
	09/2006		11		11
	05/2007		22		22
	08/2007	8			8
	04/2009		3		3
	05/2010		1		1
	04/2011		2		2
	03/2017		13	48	61
	09/2017		10		10
	10/2017		13		13
	05/2018		25		25
	Total	8	104	48	160
Bat saliva	10/2017		2		2
	05/2018		27		27
	Total	0	29	0	29
Bat feces	06/2017		8		8
	09/2017		57	73	130
	10/2017		17		17
	05/2018		50		50
	Total	0	132	73	205
Total		8	265	121	394
